# Supplementary material for: Immunoglobulin G Expression in Human Sperm and Possible Functional Significance
Source: PubMed Central journal article supplement (PMC4735602; doi:10.1038/srep20166), 2016-02-01
Supplement: srep20166-s1.pdf [file srep20166-s1.pdf]

## Immunoglobulin G Expression in Human Sperm and Possible Functional Significance

Meiling Yan<sup>af</sup>, Xiaoyu Zhang<sup>af</sup>, Qinxue Pu<sup>af</sup>, Tao Huang<sup>a</sup>, Qingdong Xie<sup>b</sup>, Yan Wang,<sup>c</sup> Jing Li<sup>a</sup>, Yun Wang<sup>a</sup>, Huan Gu<sup>a</sup>, Tianhua Huang<sup>d</sup>, Zhiling Li<sup>e</sup> and Jiang Gu<sup>a\*</sup>

**Supplementary table S1.** Antibodies used in this study.

| Name                                                | Host species | Clonality  | Dilution | Manufacture                       |
|-----------------------------------------------------|--------------|------------|----------|-----------------------------------|
| Anti-human IgG antibody ( $\gamma$ chain specific)  | rabbit       | polyclonal | 1:100    | Dako, Denmark                     |
| Anti-human IgG antibody ( $\lambda$ chain specific) | rabbit       | monoclonal | 1:100    | ZSGB-BIO, Beijing, China          |
| Anti-human IgG antibody ( $\kappa$ chain specific)  | mouse        | polyclonal | 1:100    | Dako, Denmark                     |
| Alexa Fluor® 594 anti-rabbit IgG (H+L)              | donkey       | polyclonal | 1:400    | Jackson Immuno. Research Lab, USA |
| Alexa Fluor® 488 anti-mouse IgG (H+L)               | goat         | polyclonal | 1:400    | Invitrogen, USA                   |
| Anti-human GAPDH antibody                           | mouse        | polyclonal | 1:2000   | Santa Cruze, USA                  |

**Supplementary table S2.** Primers used for PCR amplification.

| <b>Gene Name</b> | <b>Primer sequence (5'-3')</b> |                                     |
|------------------|--------------------------------|-------------------------------------|
| IGHG1            | External                       | ACGGCGTGGAGGTGCATAATG (sense)       |
|                  |                                | CGGGAGGCGTGGTCTTGTAGTT (anti-sense) |
|                  | Internal                       | GACTGGCTGAATGGCAAGGAG (sense)       |
|                  |                                | GGCGATGTCGCTGGGATAGAA (anti-sense)  |
| RAG1             | External                       | TGGATCTTTACCTGAAGATG (sense)        |
|                  |                                | CTTGGCTTTCCAGAGAGTCC (anti-sense)   |
|                  | Internal                       | CACAGCGTTTTGCTGAGCTC (sense)        |
|                  |                                | AGCTTGCCTCAGGGTTCATG (anti-sense)   |
| RAG2             | External                       | TGGAAGCAACATGGGAAATG (sense)        |
|                  |                                | CATCATCTTCATTATAGGTGTC (anti-sense) |
|                  | Internal                       | TTCTTGGCATAACCAGGAGAC (sense)       |
|                  |                                | CTATTTGCTTCTGCACTG (anti-sense)     |
| AID              | External                       | GAAGAGGCGTGACAGTGCT (sense)         |
|                  |                                | CGAAATGCGTCTCGTAAGT (anti-sense)    |
|                  | Internal                       | CCTTTTCACTGGACTTTGG (sense)         |
|                  |                                | TGATGGCTATTTGCACCCC (anti-sense)    |
| GAPDH            | External                       | ACCACAGTCCATGCCATCAC (sense)        |
|                  |                                | TCCACCACCCTGTTGCTGTA (anti-sense)   |
|                  | Internal                       | ACCACAGTCCATGCCATCAC (sense)        |
|                  |                                | TCCACCACCCTGTTGCTGTA (anti-sense)   |
| IgG $\lambda$    | External                       | GAGCCTGACGCCTGAG (sense)            |
|                  | Internal                       | ATTGAGGGTTTATTGAGTGCAG (anti-sense) |
| IgG $\kappa$     | External                       | TGAGCAAAGCAGACTACGAGA (sense)       |
|                  | Internal                       | GGGGTGAGGTGAAAGATGAG (anti-sense)   |
| CD19             | External                       | TACTATGGCACTGGCTGCTG (sense)        |
|                  | Internal                       | CACGTTCCCGTACTGGTTCT (anti-sense)   |
